# Supplementary material for: Chemistry-driven changes strongly influence climate forcing from vegetation emissions
Source: PubMed Central journal article supplement (PMC9684129; doi:10.1038/s41467-022-34944-9), 2022-11-23
Supplement: 41467_2022_34944_MOESM2_ESM.pdf [file 41467_2022_34944_MOESM2_ESM.pdf]

## Supplementary Information

James Weber, Scott Archer-Nicholls, N. Luke Abraham, Youngsub Matthew Shin, Paul Griffiths, Daniel P. Grosvenor, Catherine E. Scott and Alex T. Archibald

Corresponding author: James Weber  
Email: j.weber@sheffield.ac.uk

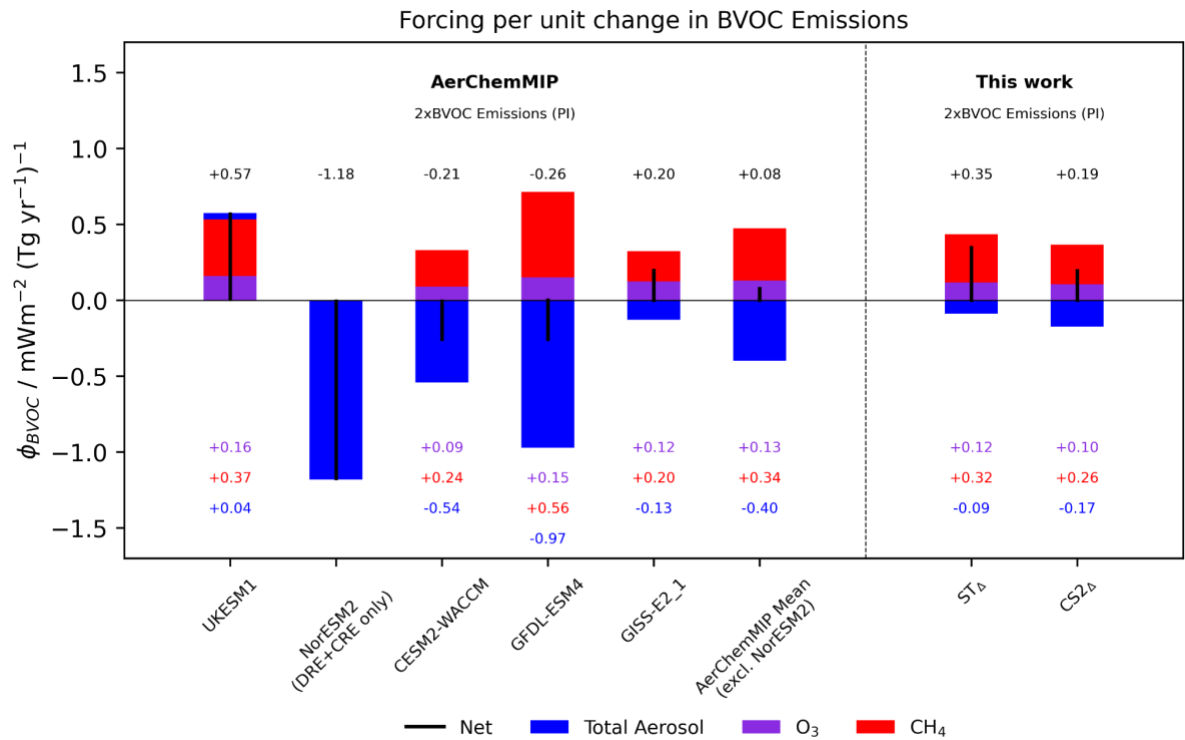

**Fig. S1.** Forcing per unit change in BVOC emissions from the AerChemMIP 2xBVOC study (Thornhill et al., 2021) and this work.

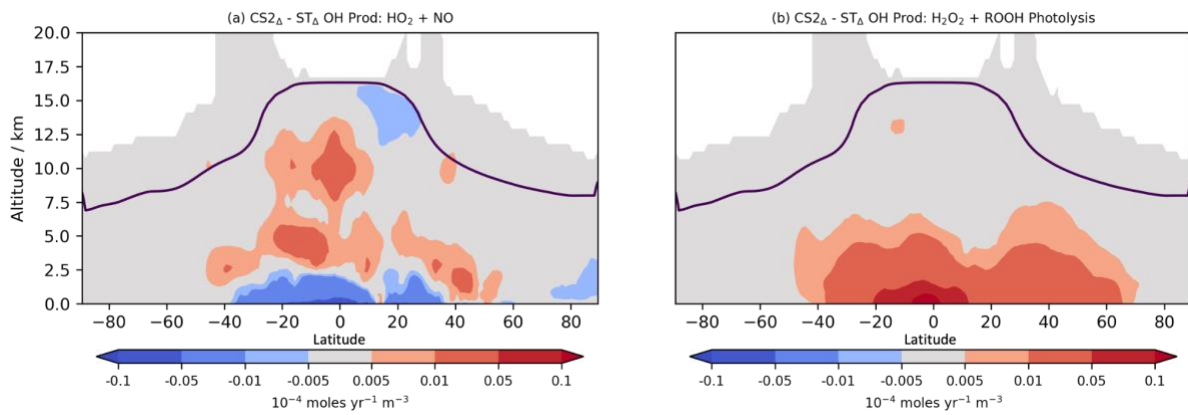

**Fig. S2.** OH production differences. Zonal mean difference between Strat-Trop ( $ST_{\Delta}$ ) and CRI-Strat 2 ( $CS2_{\Delta}$ ) for OH production from (a)  $HO_2 + NO$  and (b)  $H_2O_2$  and other peroxides (ROOH).

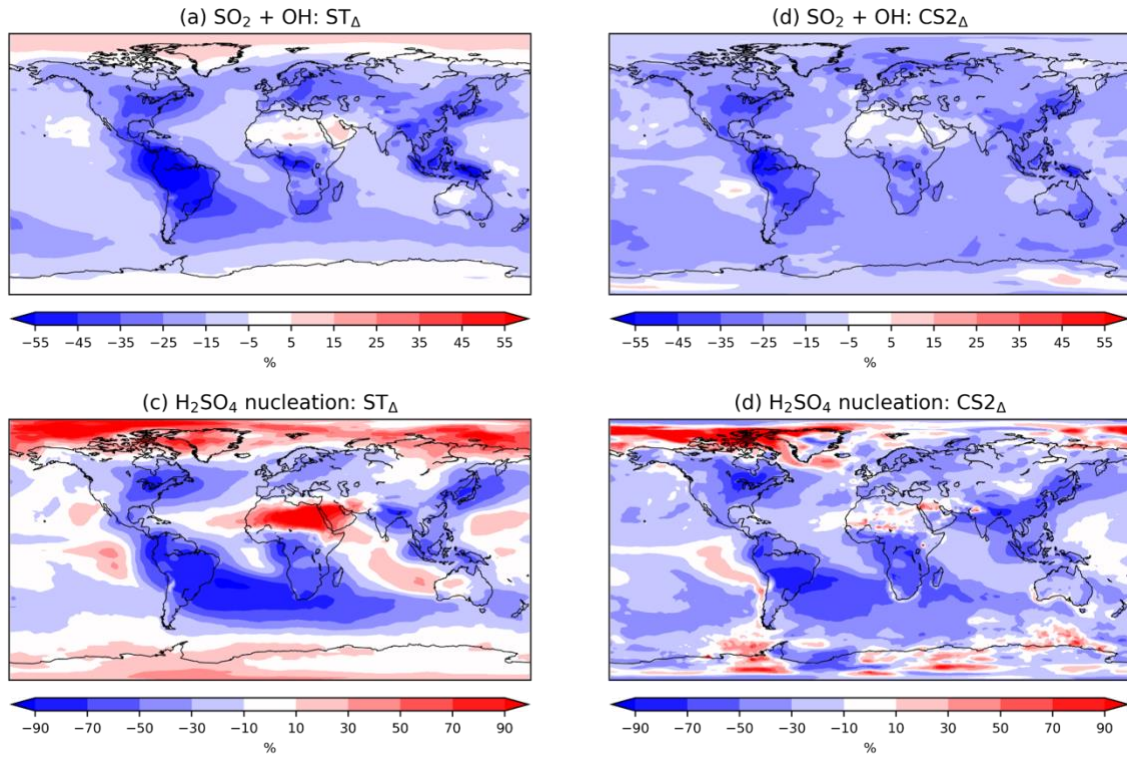

**Fig. S3.**  $\text{SO}_2$  oxidation and  $\text{H}_2\text{SO}_4$  nucleation. Percentage change in vertically integrated flux of  $\text{SO}_2 + \text{OH}$  for (a) Strat-Trop ( $\text{ST}_\Delta$ ) and (b) CRI-Strat 2 ( $\text{CS2}_\Delta$ ) and nucleation flux of new particle formation from  $\text{H}_2\text{SO}_4$  for (c)  $\text{ST}_\Delta$  and (d)  $\text{CS2}_\Delta$ .

## Supplementary References

1. G. Thornhill et al. Climate-driven chemistry and aerosol feedbacks in CMIP6 Earth system models. *Atmospheric Chemistry and Physics* 21.2, 1105-1126 (2021).
